# Supplementary material for: Broad-band sensitized visible up-conversion in Y2Mg3Ge3O12:Ni2+,Er3+,Nb5+ phosphors
Source: Royal Society of Chemistry journal article supplement (doi:10.1039/d2ma00519k), 2022-01-01
Supplement: d2ma00519k1.pdf [file d2ma00519k1.pdf]

## Supporting Information

### Broad-band sensitized visible up-conversion in $\text{Y}_2\text{Mg}_3\text{Ge}_3\text{O}_{12}$ : $\text{Ni}^{2+}$ , $\text{Er}^{3+}$ , $\text{Nb}^{5+}$ phosphor

Weiqi Yang, Siguo Xiao\*, Xiaoliang Yang, Yaoxiang Zhao

School of Physics and Optoelectronics, Xiangtan University, Hunan 411105, China.

\*E-mail: [xiaosiguo@xtu.edu.cn](mailto:xiaosiguo@xtu.edu.cn)

The up-conversion (UC) emission spectra of  $\text{Ni}^{2+}$  doped  $\text{YNbO}_4$ ,  $\text{Er}^{3+}$  doped  $\text{YNbO}_4$  and  $\text{Ni}^{2+}$ ,  $\text{Er}^{3+}$  co-doped  $\text{YNbO}_4$  samples under 1064 nm excitation.

As mentioned in the main text,  $\text{YNbO}_4$  impurity exists in the prepared of  $\text{Ni}^{2+}$ ,  $\text{Er}^{3+}$  and  $\text{Ni}^{5+}$  tri-doped  $\text{Y}_2\text{Mg}_3\text{Ge}_3\text{O}_{12}$  sample. However, the presence of a small amount of impurity ( $\text{YNbO}_4$ ) did not affect the UC process of the samples. As shown in Fig. S1, the  $\text{Ni}^{2+}$  doped  $\text{YNbO}_4$ ,  $\text{Er}^{3+}$  doped  $\text{YNbO}_4$  and  $\text{Ni}^{2+}$ ,  $\text{Er}^{3+}$  co-doped  $\text{YNbO}_4$  samples prepared by us have not exhibit UC emission under 1064 nm excitation. This indicates that the broadband  $\text{Ni}^{2+}$  sensitized up-conversion of  $\text{Er}^{3+}$  observed in the manuscript occurs only in the  $\text{Y}_2\text{Mg}_3\text{Ge}_3\text{O}_{12}$  matrix.

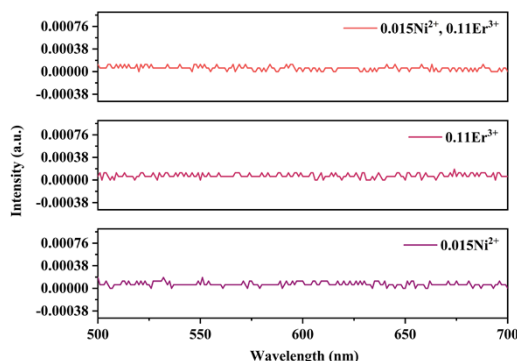

Figure S1. UC emission spectra of  $\text{Ni}^{2+}$  doped  $\text{YNbO}_4$ ,  $\text{Er}^{3+}$  doped  $\text{YNbO}_4$  and  $\text{Ni}^{2+}$ ,  $\text{Er}^{3+}$  co-doped  $\text{YNbO}_4$  samples under 1064 nm excitation.
